# Supplementary material
Source: MDPI journal article supplement (https://www.mdpi.com/2073-4441/14/1/72)
Supplement: s1 [file s1]

# Effect of the aeration strategy on NOB suppression in activated sludge and biofilm in a hybrid reactor with nitrification/denitrification

Olga Zajac <sup>1,\*</sup>, Monika Zubrowska-Sudol <sup>1</sup>, Slawomir Ciesielski <sup>2</sup> and Martyna Godzieba <sup>2,\*</sup>

Supplementary material - Results of particular AUR and NitUR tests

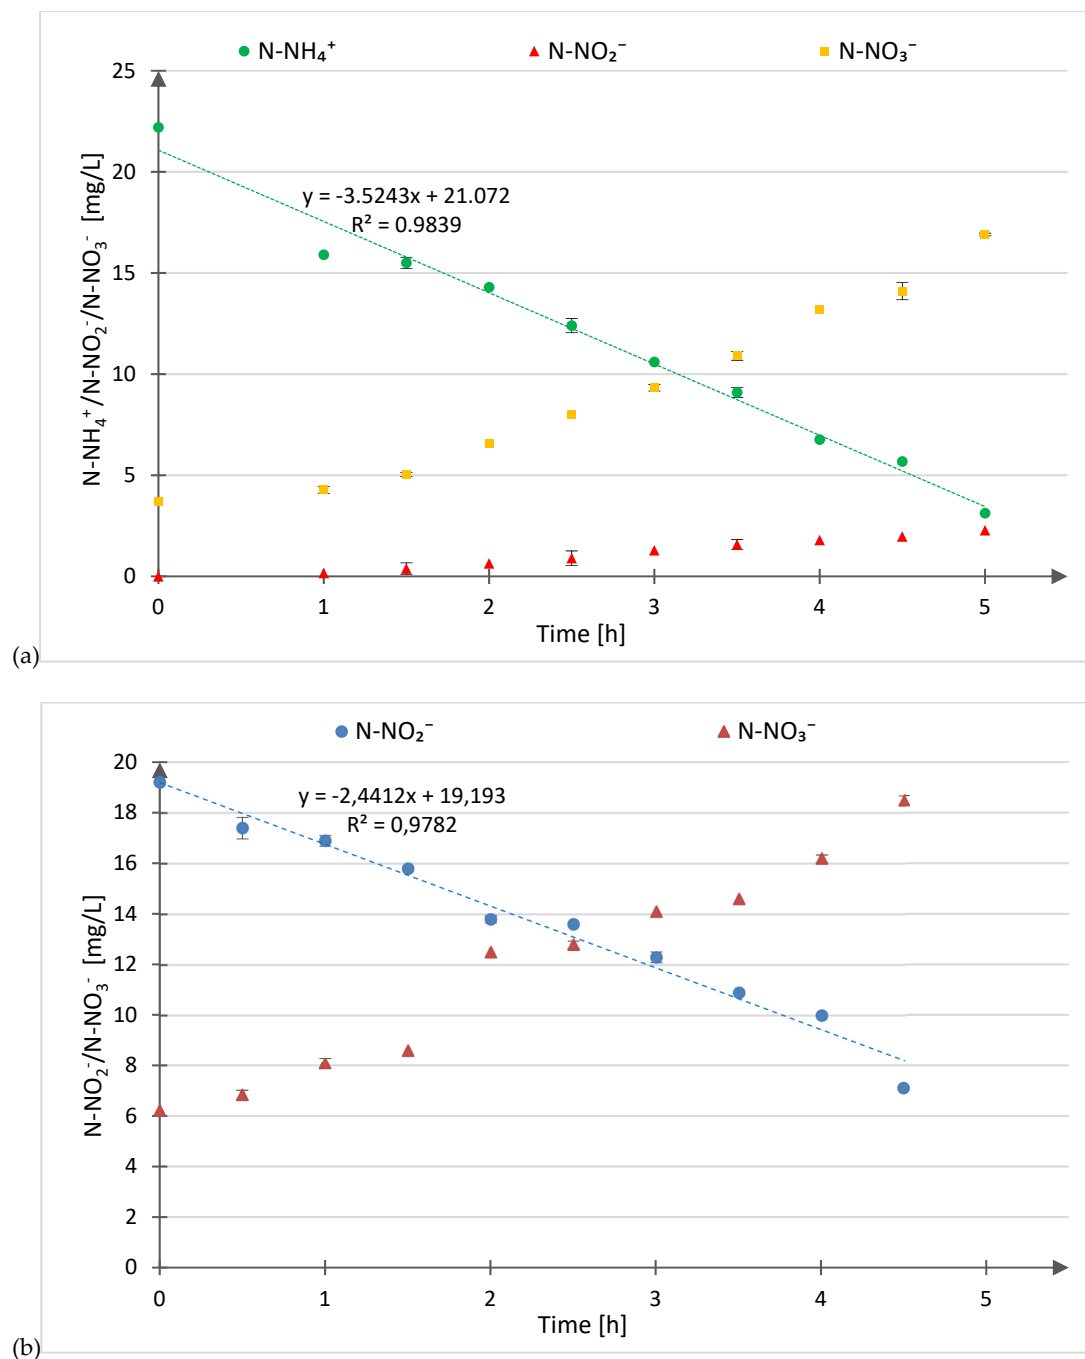

**Figure S1**  $\text{N-NH}_4^+$ ,  $\text{N-NO}_2^-$ ,  $\text{N-NO}_3^-$  profiles during test (a) AUR-SB (b) NitUR-SB. Stage I

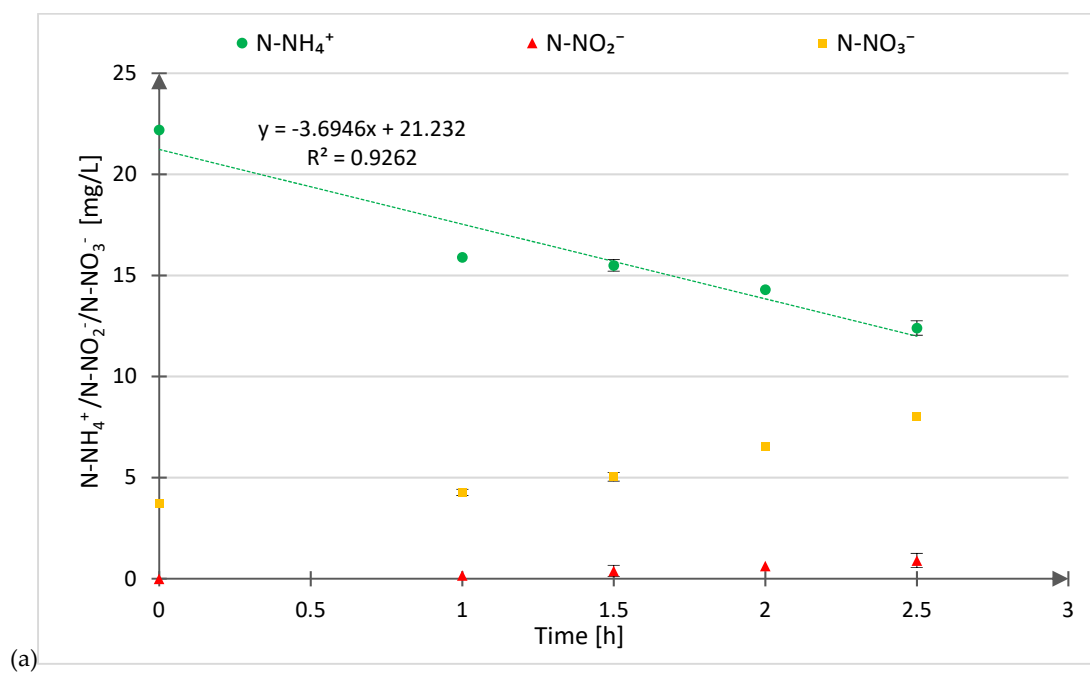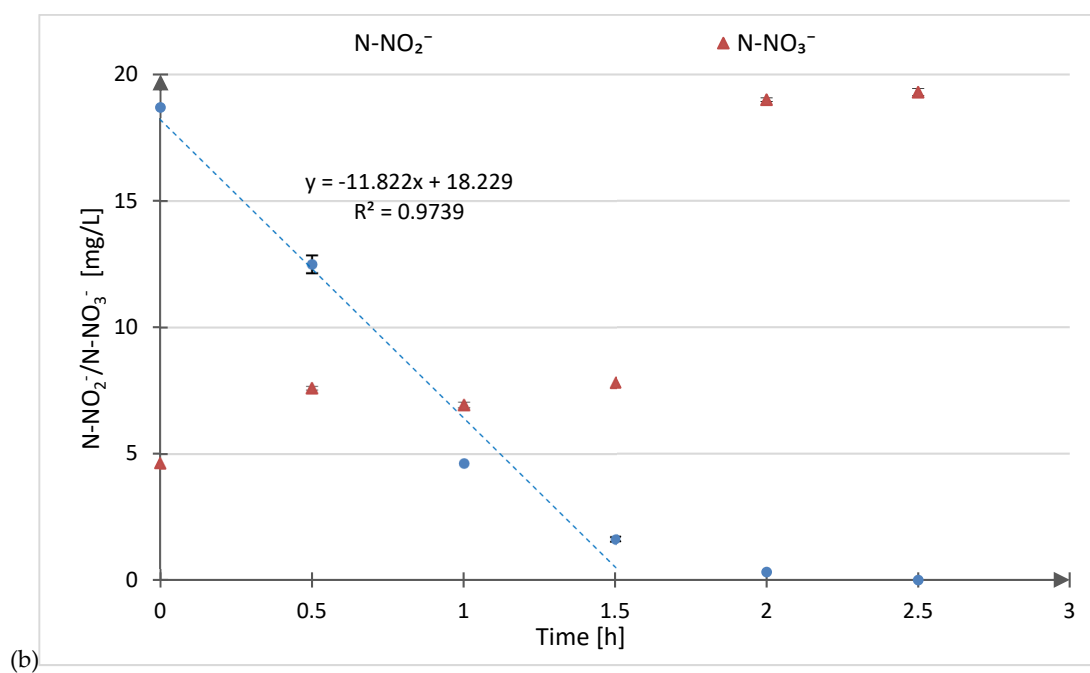

**Figure S2** N-NH<sub>4</sub><sup>+</sup>, N-NO<sub>2</sub><sup>-</sup>, N-NO<sub>3</sub><sup>-</sup> profiles during test (a) AUR-B (b) NitUR-B. Stage I

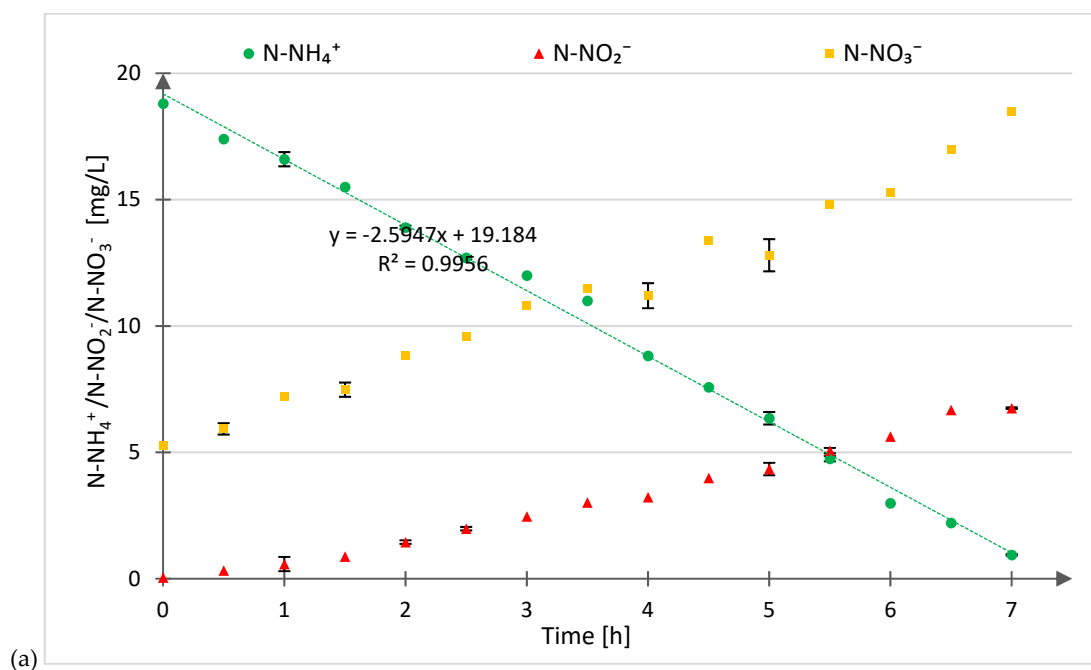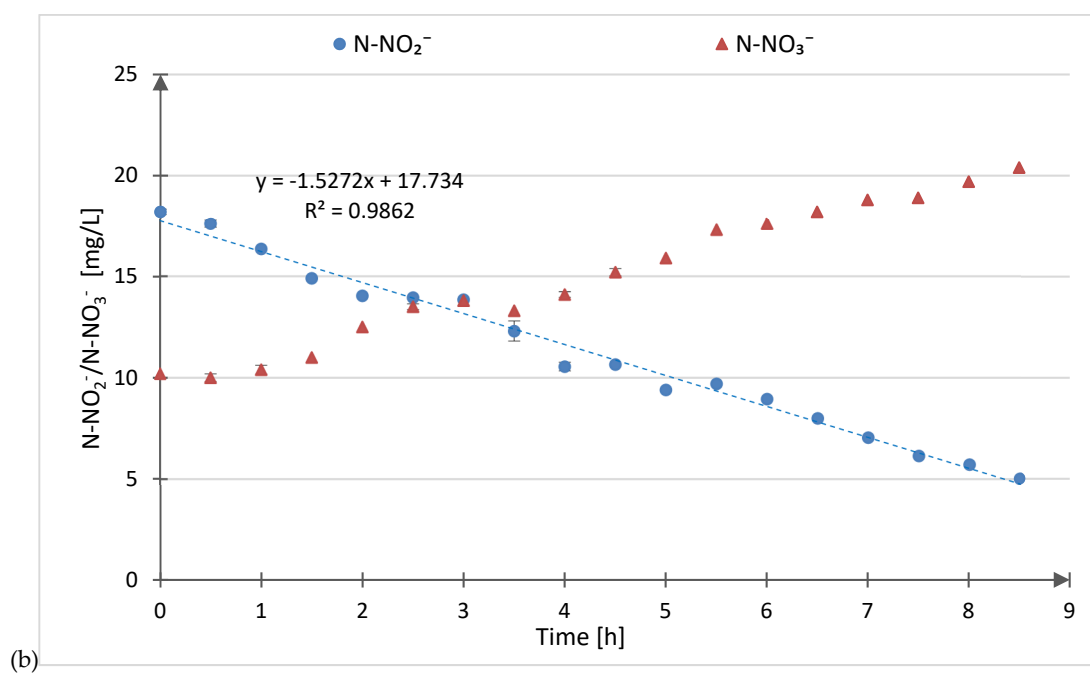

**Figure S3**  $\text{N-NH}_4^+$ ,  $\text{N-NO}_2^-$ ,  $\text{N-NO}_3^-$  profiles during test (a) AUR-SB (b) NitUR-SB. Stage II

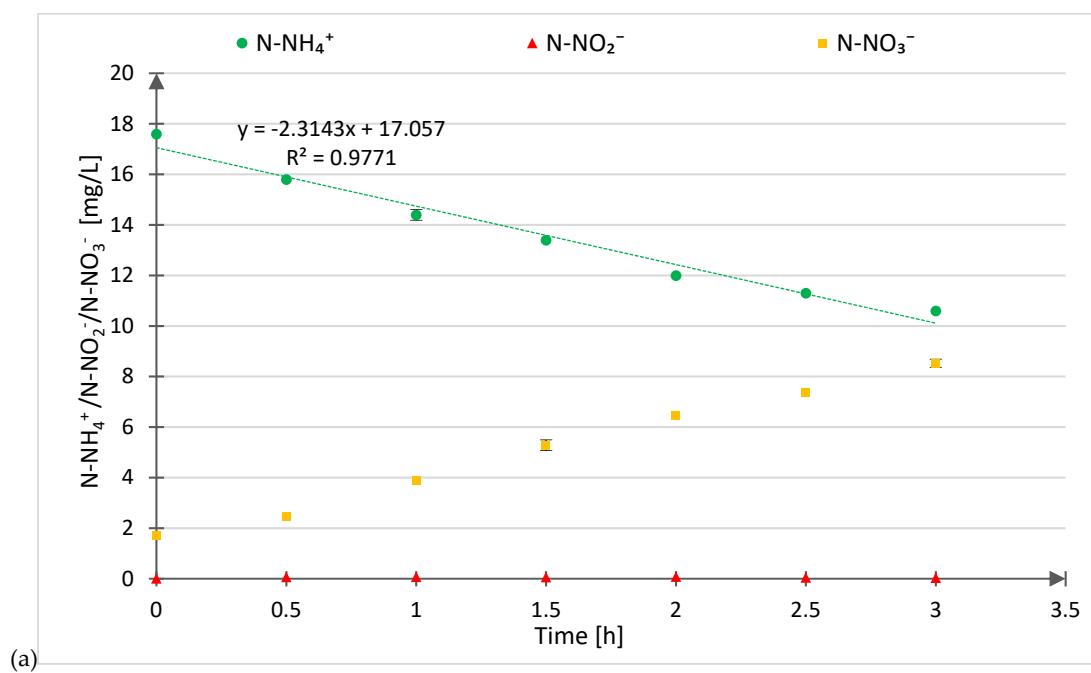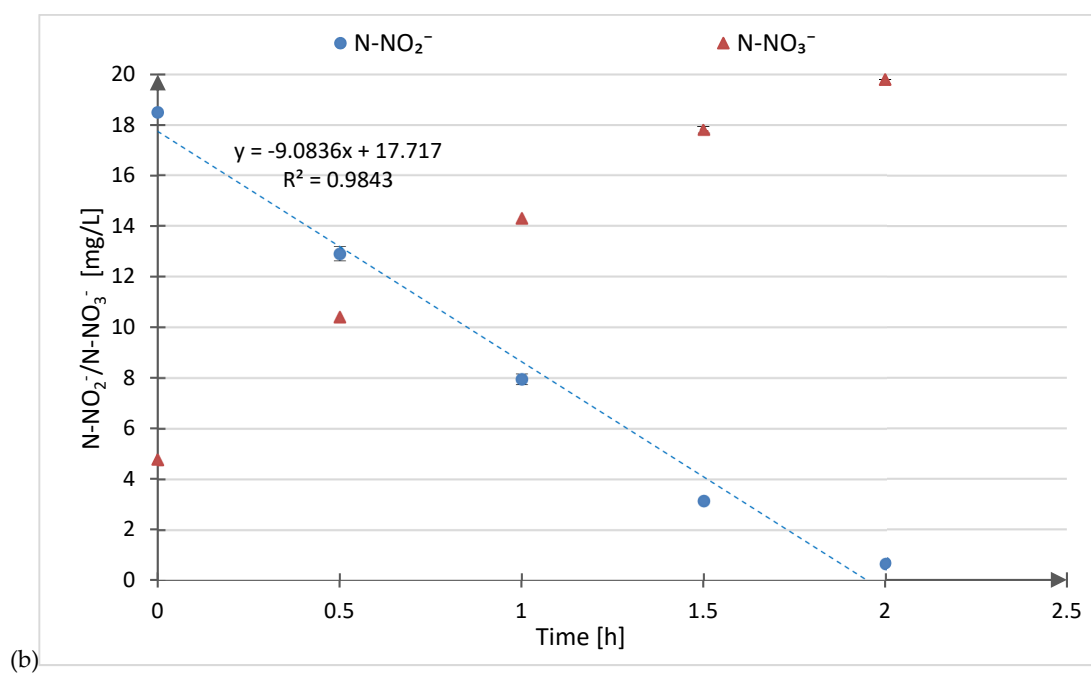

**Figure S4**  $\text{N-NH}_4^+$ ,  $\text{N-NO}_2^-$ ,  $\text{N-NO}_3^-$  profiles during test (a) AUR-B (b) NitUR-B. Stage II

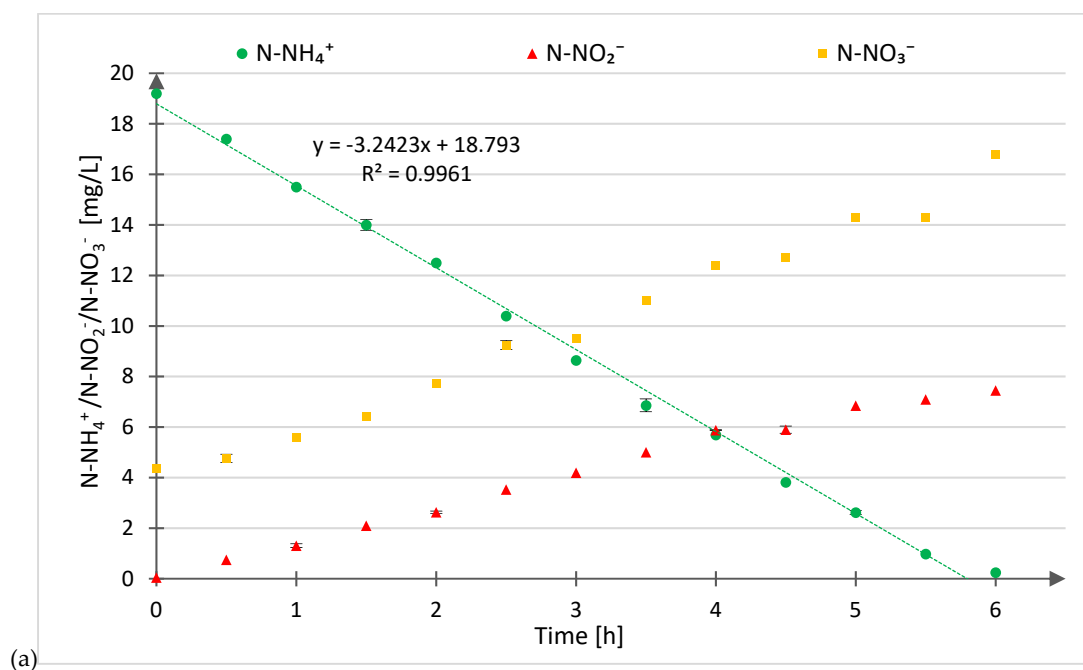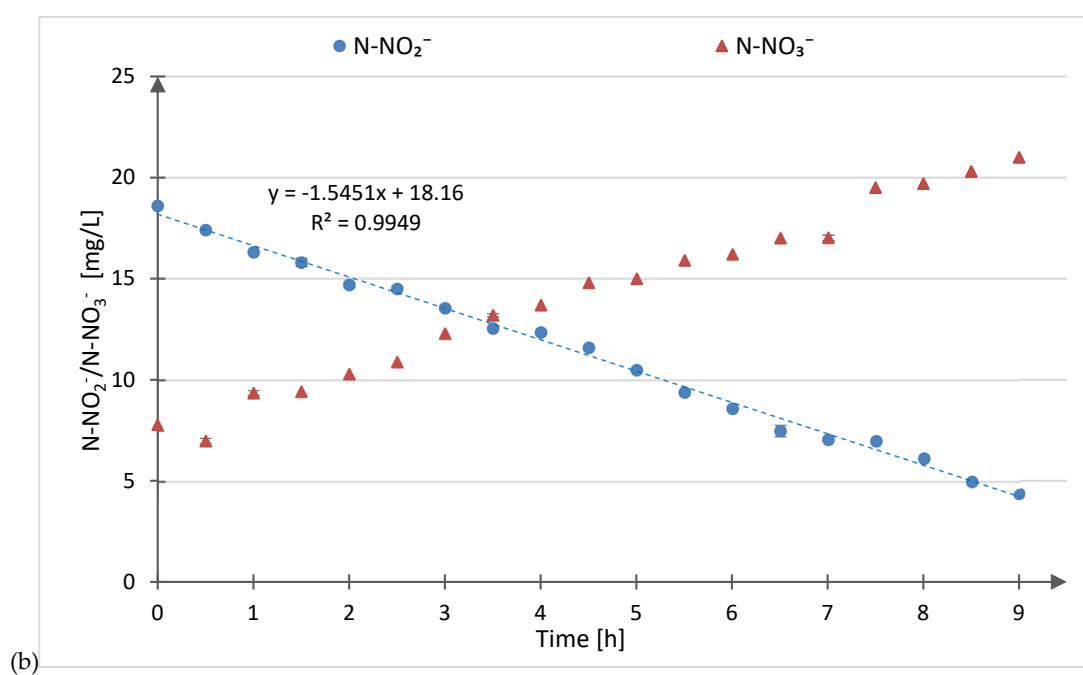

**Figure S5**  $\text{N-NH}_4^+$ ,  $\text{N-NO}_2^-$ ,  $\text{N-NO}_3^-$  profiles during test (a) AUR-SB (b) NitUR-SB. Stage III

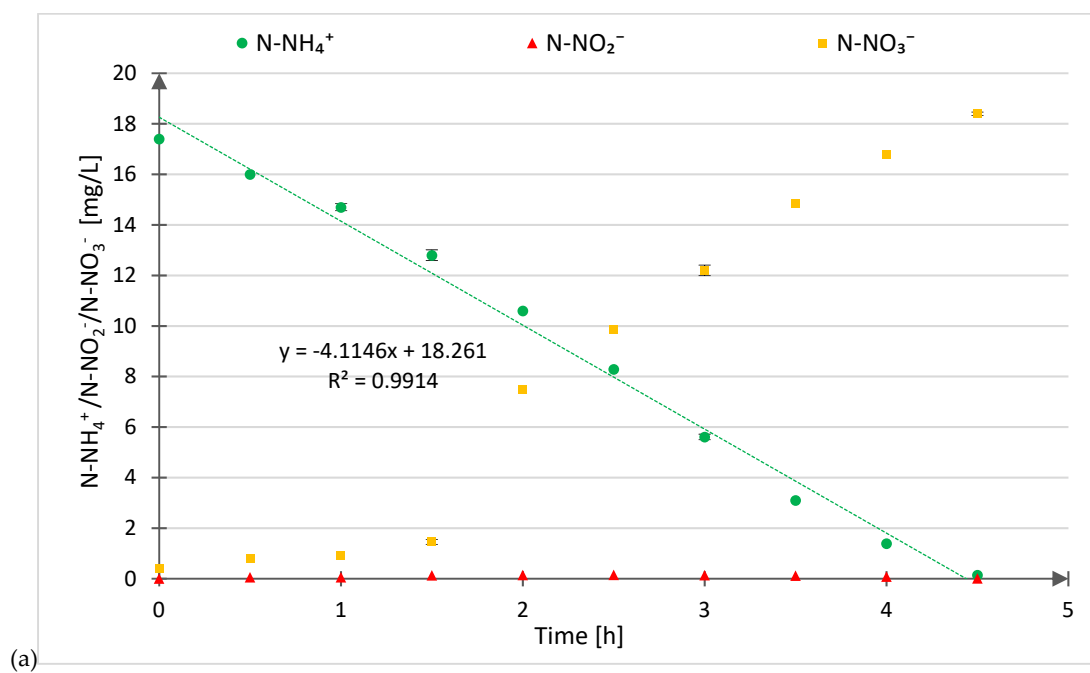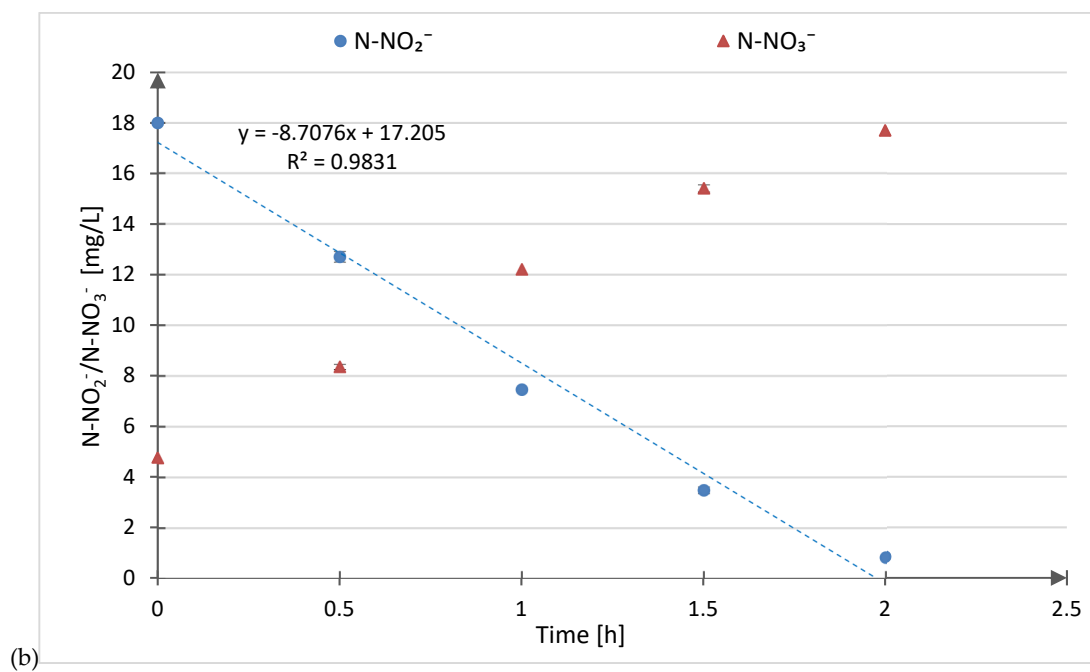

**Figure S6**  $\text{N-NH}_4^+$ ,  $\text{N-NO}_2^-$ ,  $\text{N-NO}_3^-$  profiles during test (a) AUR-B (b) NitUR-B. Stage III

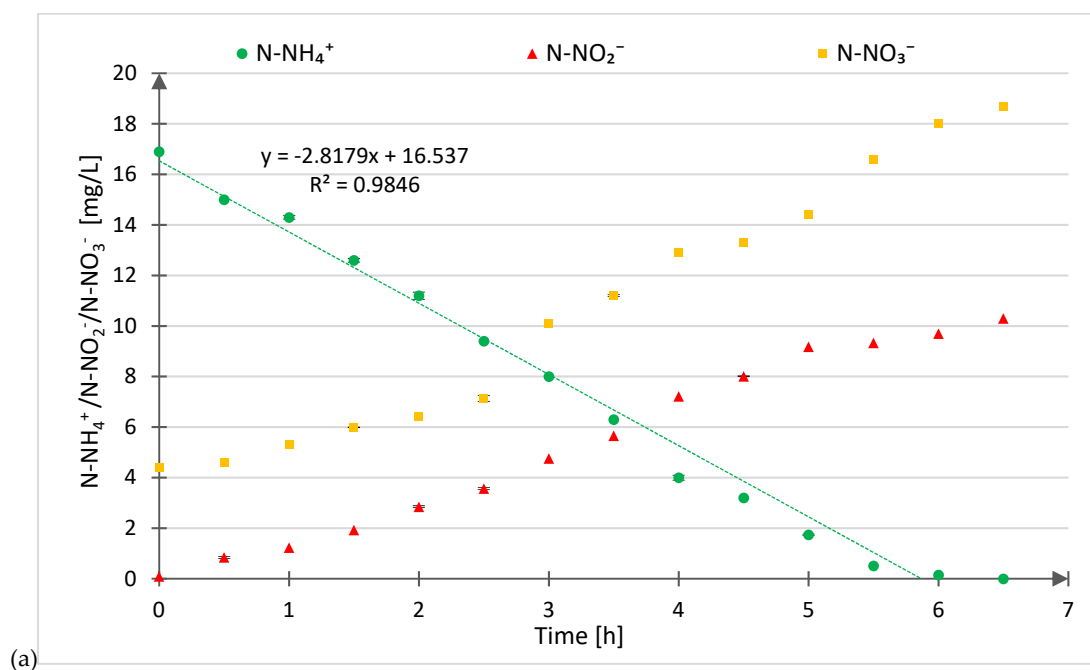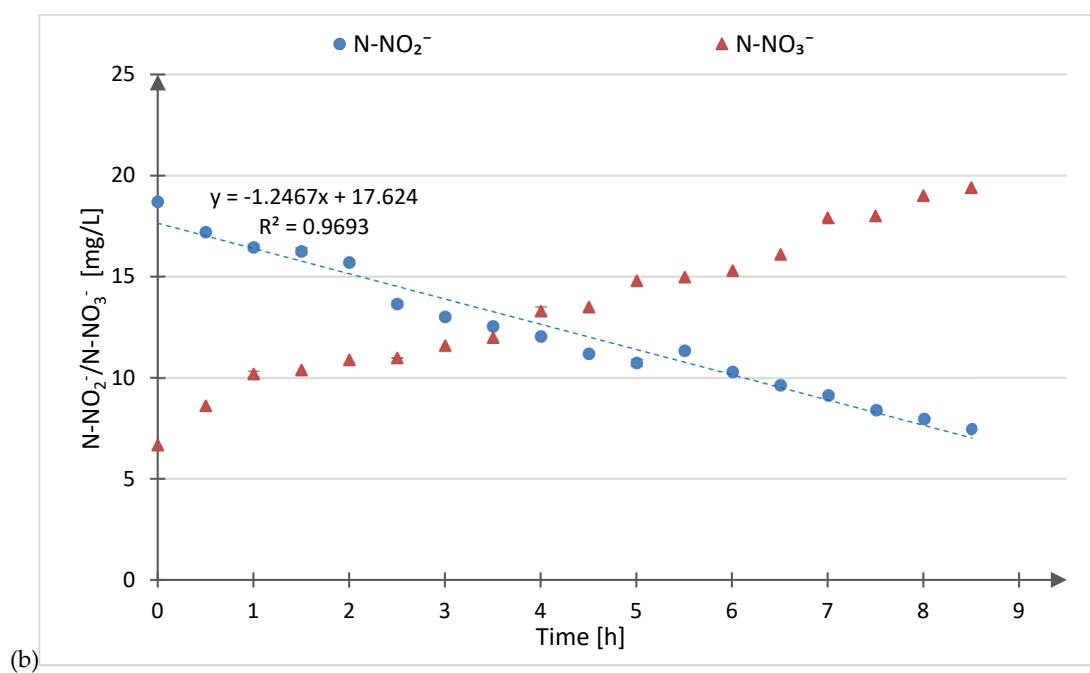

**Figure S7**  $\text{N-NH}_4^+$ ,  $\text{N-NO}_2^-$ ,  $\text{N-NO}_3^-$  profiles during test (a) AUR-SB (b) NitUR-SB. Stage IV

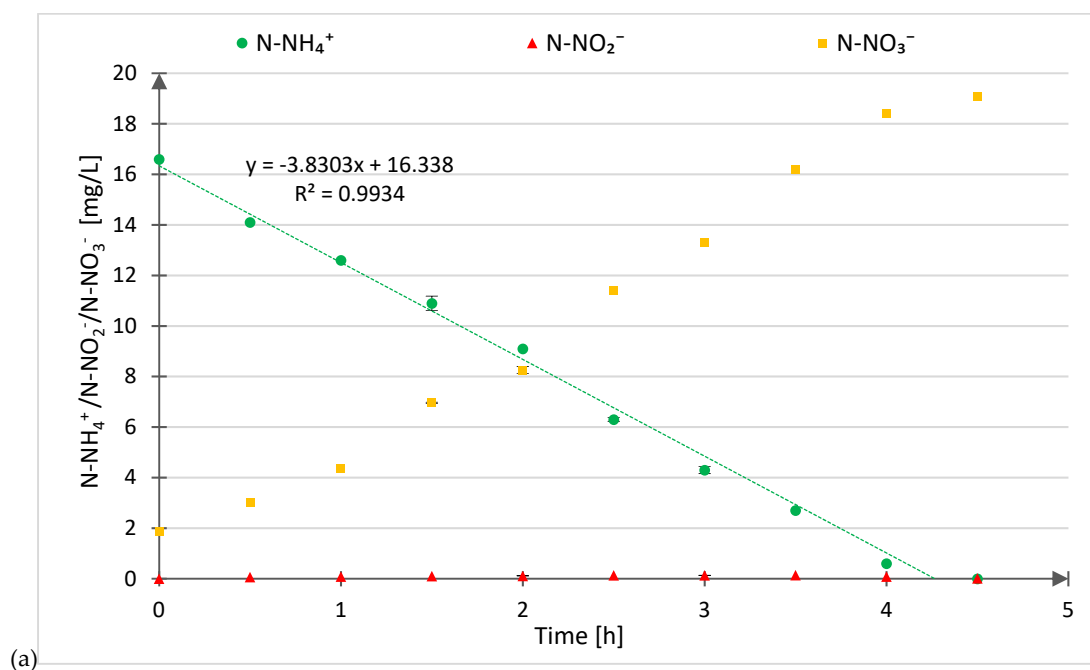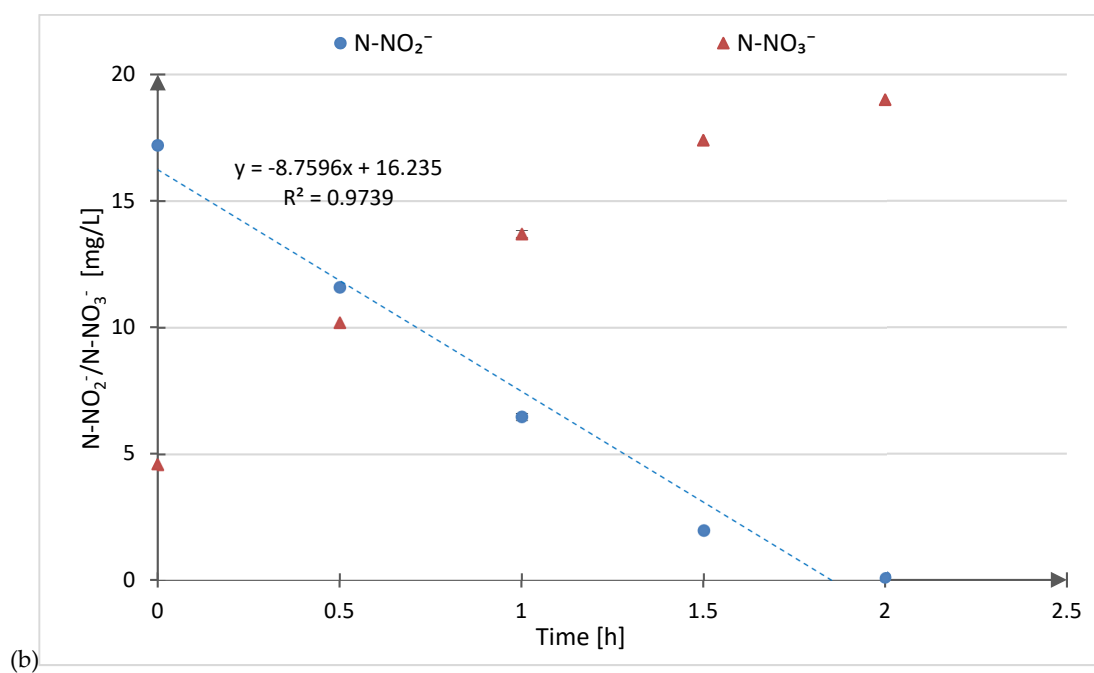

**Figure S8**  $\text{N-NH}_4^+$ ,  $\text{N-NO}_2^-$ ,  $\text{N-NO}_3^-$  profiles during test (a) AUR-B (b) NitUR-B. Stage IV
